# Supplementary material for: Genetic structure of coast redwood (Sequoia sempervirens [D. Don] Endl.) populations in and outside of the natural distribution range based on nuclear and chloroplast microsatellite markers
Source: PubMed Central journal article supplement (PMC7732113; doi:10.1371/journal.pone.0243556), 2020-12-11

**S7 Fig. STRUCTURE results for the reference data sets C and F based on 12 nSSR markers.** Plots for data sets C and F are presented for the most likely number of clusters (K) inferred without (a) and with (b) the 'locprior' function (K=6 and K=2 for C and K=2 for F, respectively). L(K) and  $\Delta K$  statistics generated by the ClumpPAK software are also presented.

C (a)

K=6

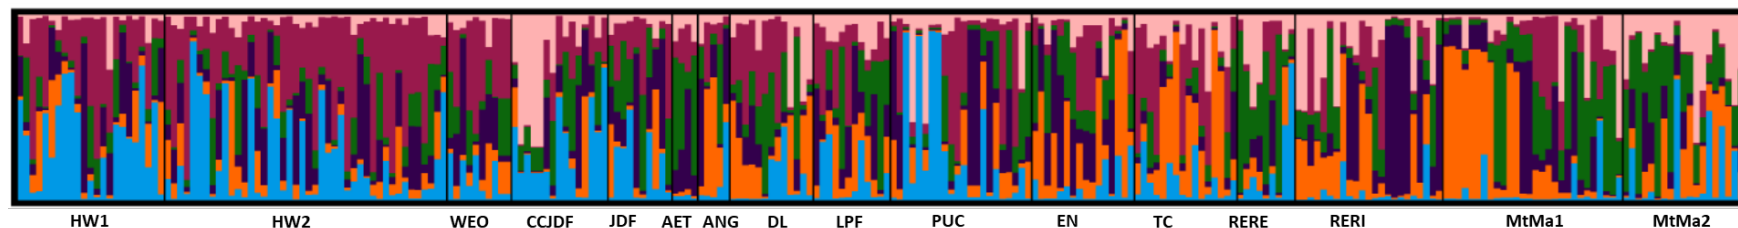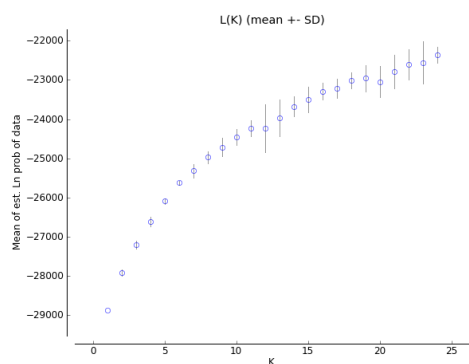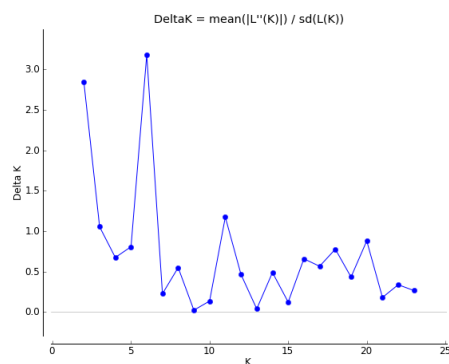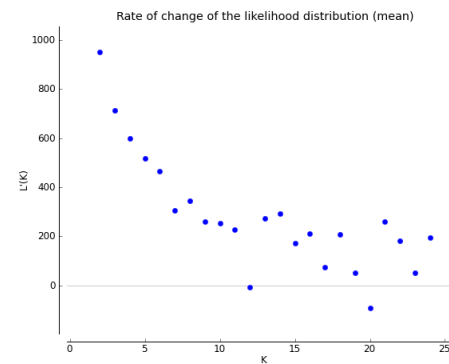

C (b)

K=2

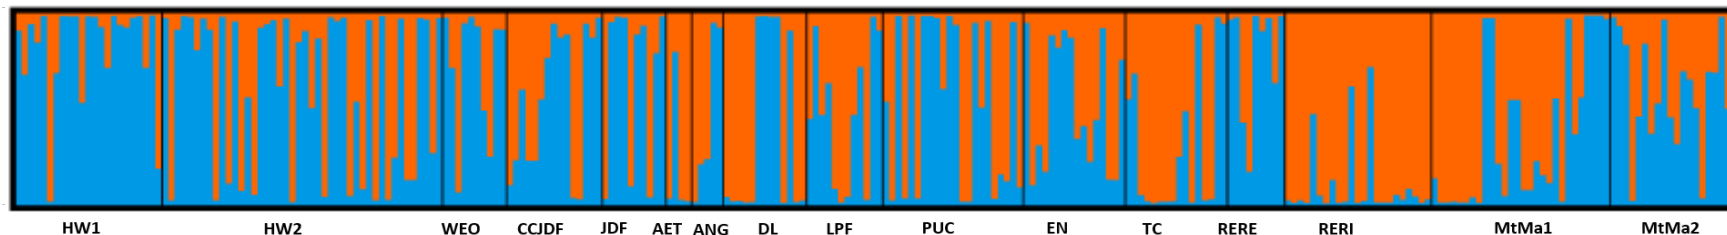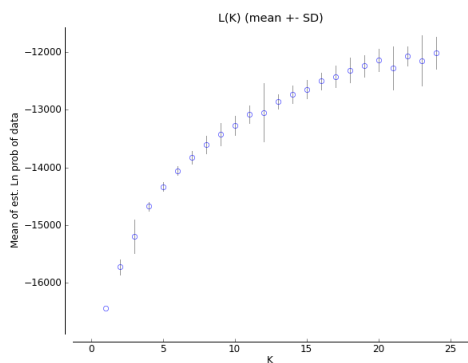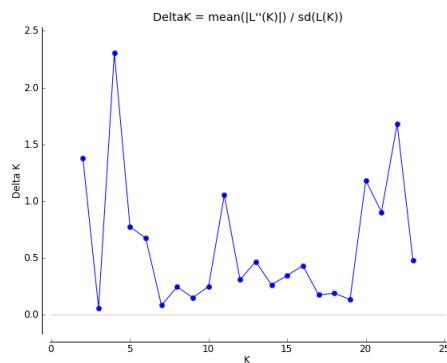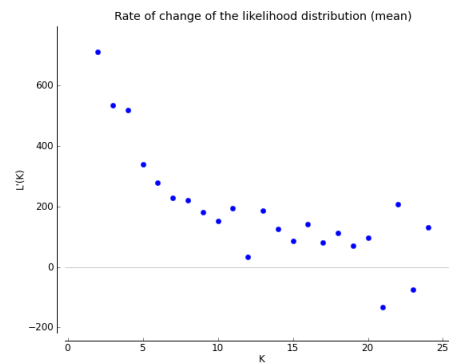

K=2

F (a)

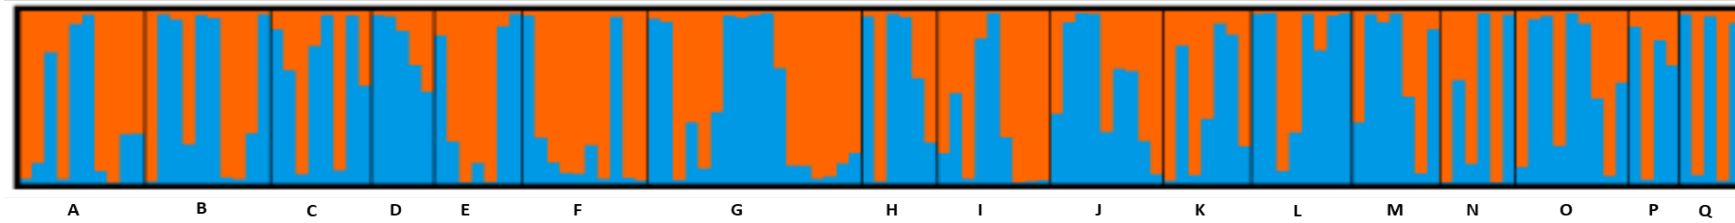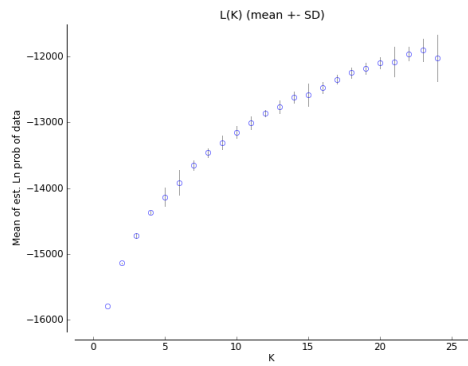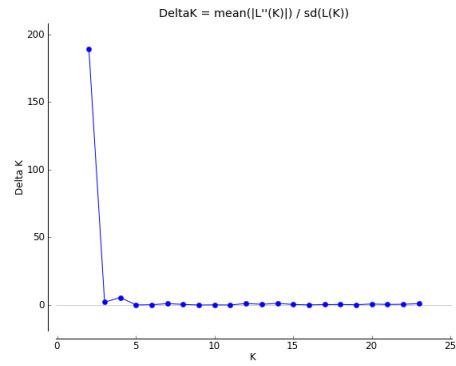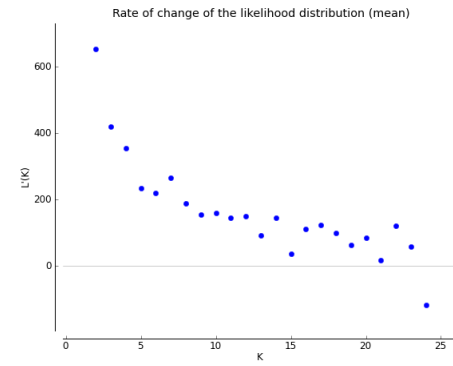

K=2

F (b)

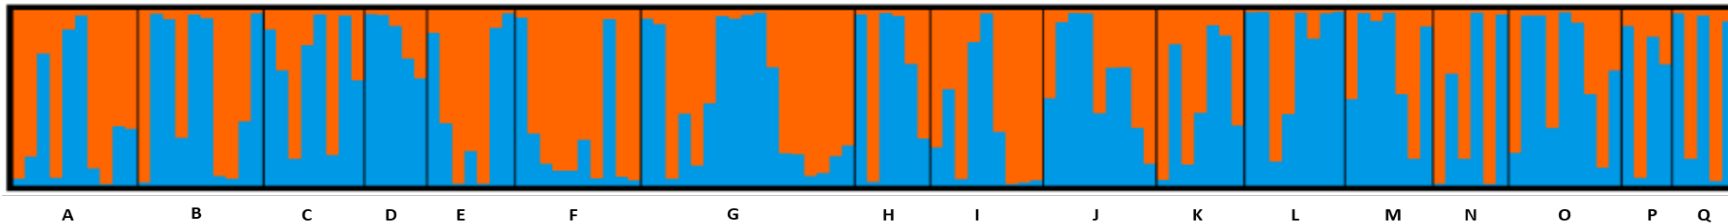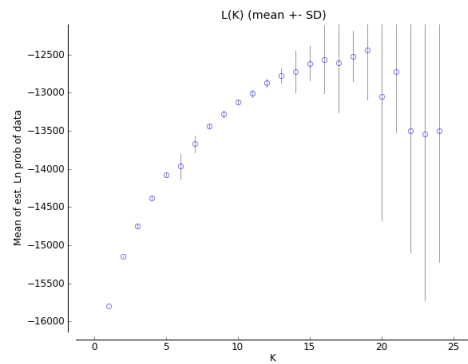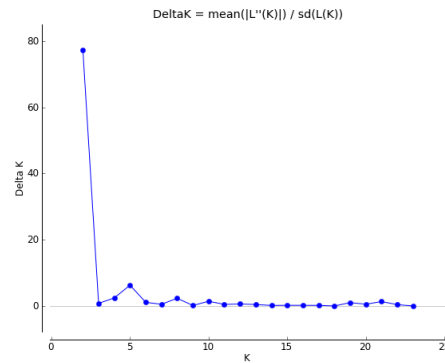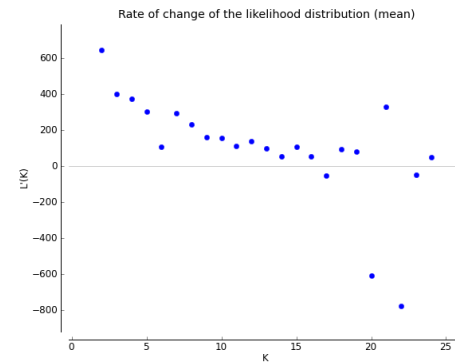

Supplement: pone.0243556.s007.pdf [file pone.0243556.s007.pdf]
