# Supplementary material for: Genetic structure of coast redwood (Sequoia sempervirens [D. Don] Endl.) populations in and outside of the natural distribution range based on nuclear and chloroplast microsatellite markers
Source: PubMed Central journal article supplement (PMC7732113; doi:10.1371/journal.pone.0243556), 2020-12-11

**S1 Fig. Map of the original 'Kuser's samples' (data set F).** Original locations of the 'Kuser's' samples in the data set F are presented on the map together with the mean monthly temperature pattern for the time period 1979-2013 indicating colder and warmer temperatures by darker and lighter shades of grey (<http://chelsa-climate.org>).

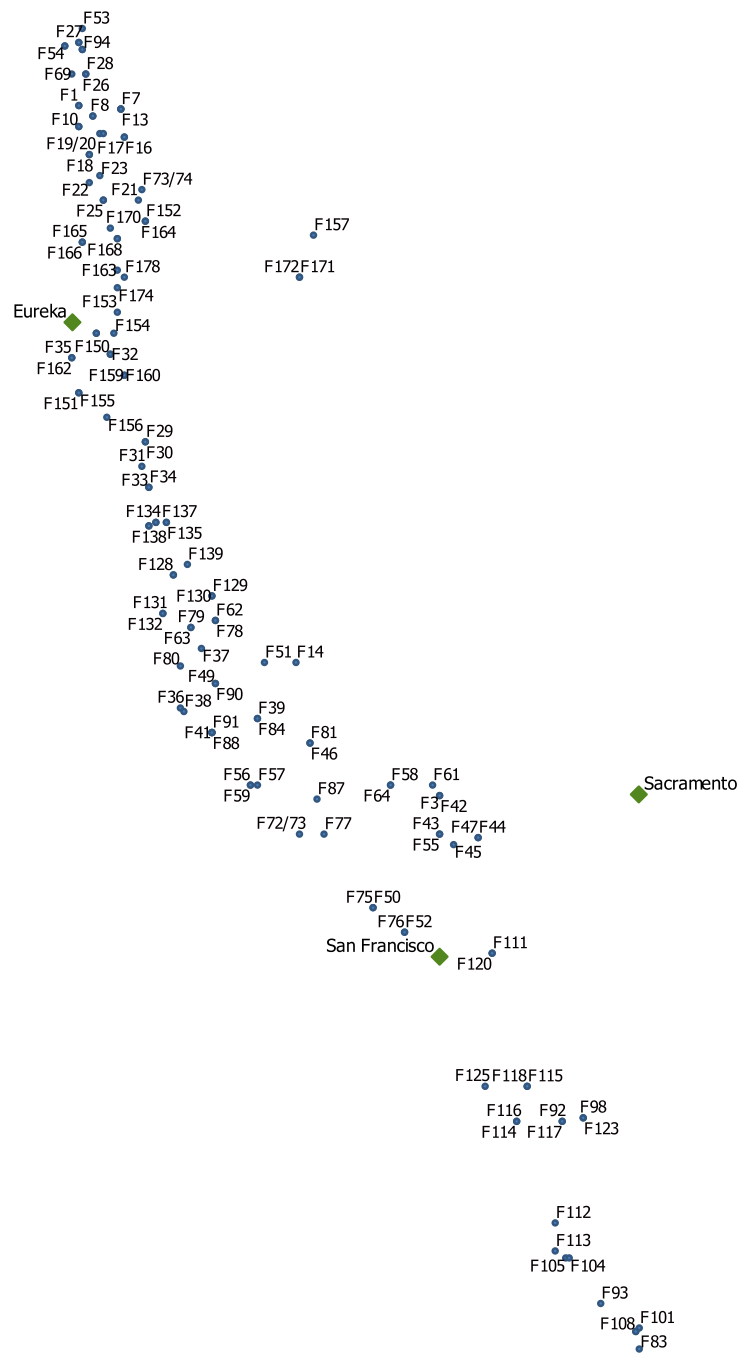

Supplement: pone.0243556.s001.pdf [file pone.0243556.s001.pdf]
