# Supplementary material for: Genetic structure of coast redwood (Sequoia sempervirens [D. Don] Endl.) populations in and outside of the natural distribution range based on nuclear and chloroplast microsatellite markers
Source: PubMed Central journal article supplement (PMC7732113; doi:10.1371/journal.pone.0243556), 2020-12-11

**S2 Fig. Map of the German sampling locations (data set G).** Darker and lighter shades of grey highlight colder and warmer mean monthly temperatures for the period 1979-2013 (<http://chelsa-climate.org>).

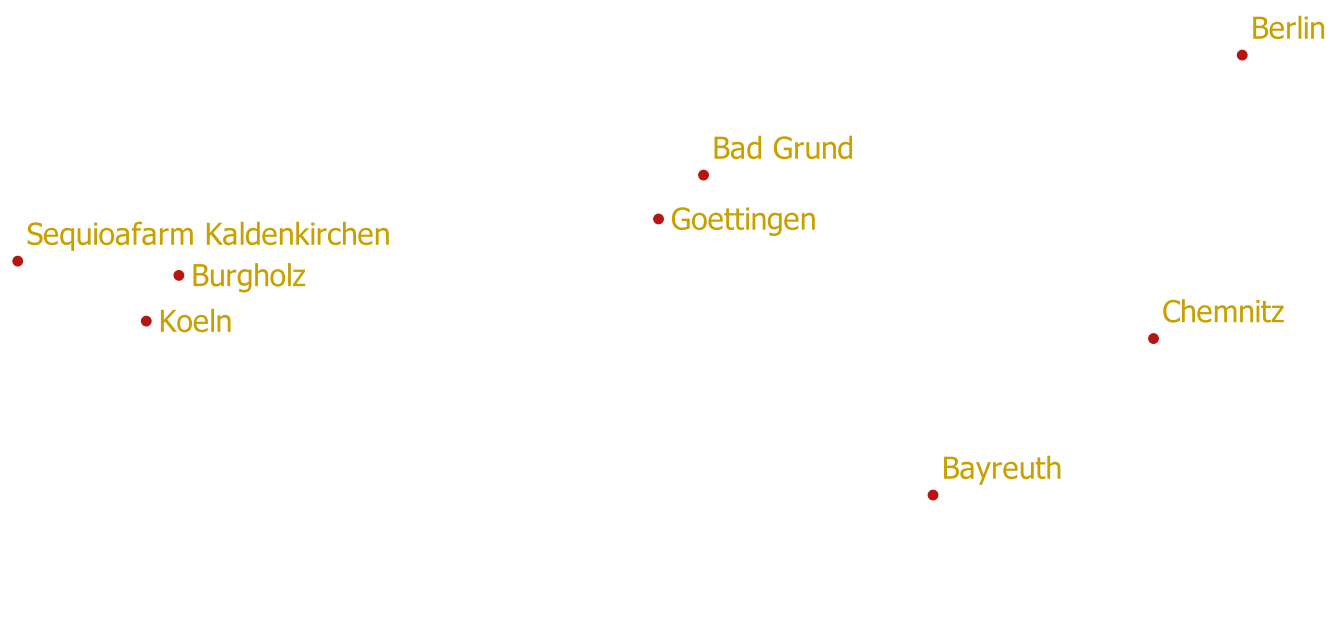

Supplement: pone.0243556.s002.pdf [file pone.0243556.s002.pdf]
