# Supplementary material for: Genetic structure of coast redwood (Sequoia sempervirens [D. Don] Endl.) populations in and outside of the natural distribution range based on nuclear and chloroplast microsatellite markers
Source: PubMed Central journal article supplement (PMC7732113; doi:10.1371/journal.pone.0243556), 2020-12-11

**S3 Fig. Neighbour-joining tree of 84 ramets representing 30 different clones (2-3 ramets per clone) provided by the Allerweltsgrün nursery (Köln).**

It is based on 12 nSSR markers with the final ranking combination obtained according to Pfeiffer et al. [42] and the 'bruvo genetic distance' [45].

Numbers indicate bootstrap values (not percentage). The sample ID represents the clone ID followed by the ramet consecutive number.

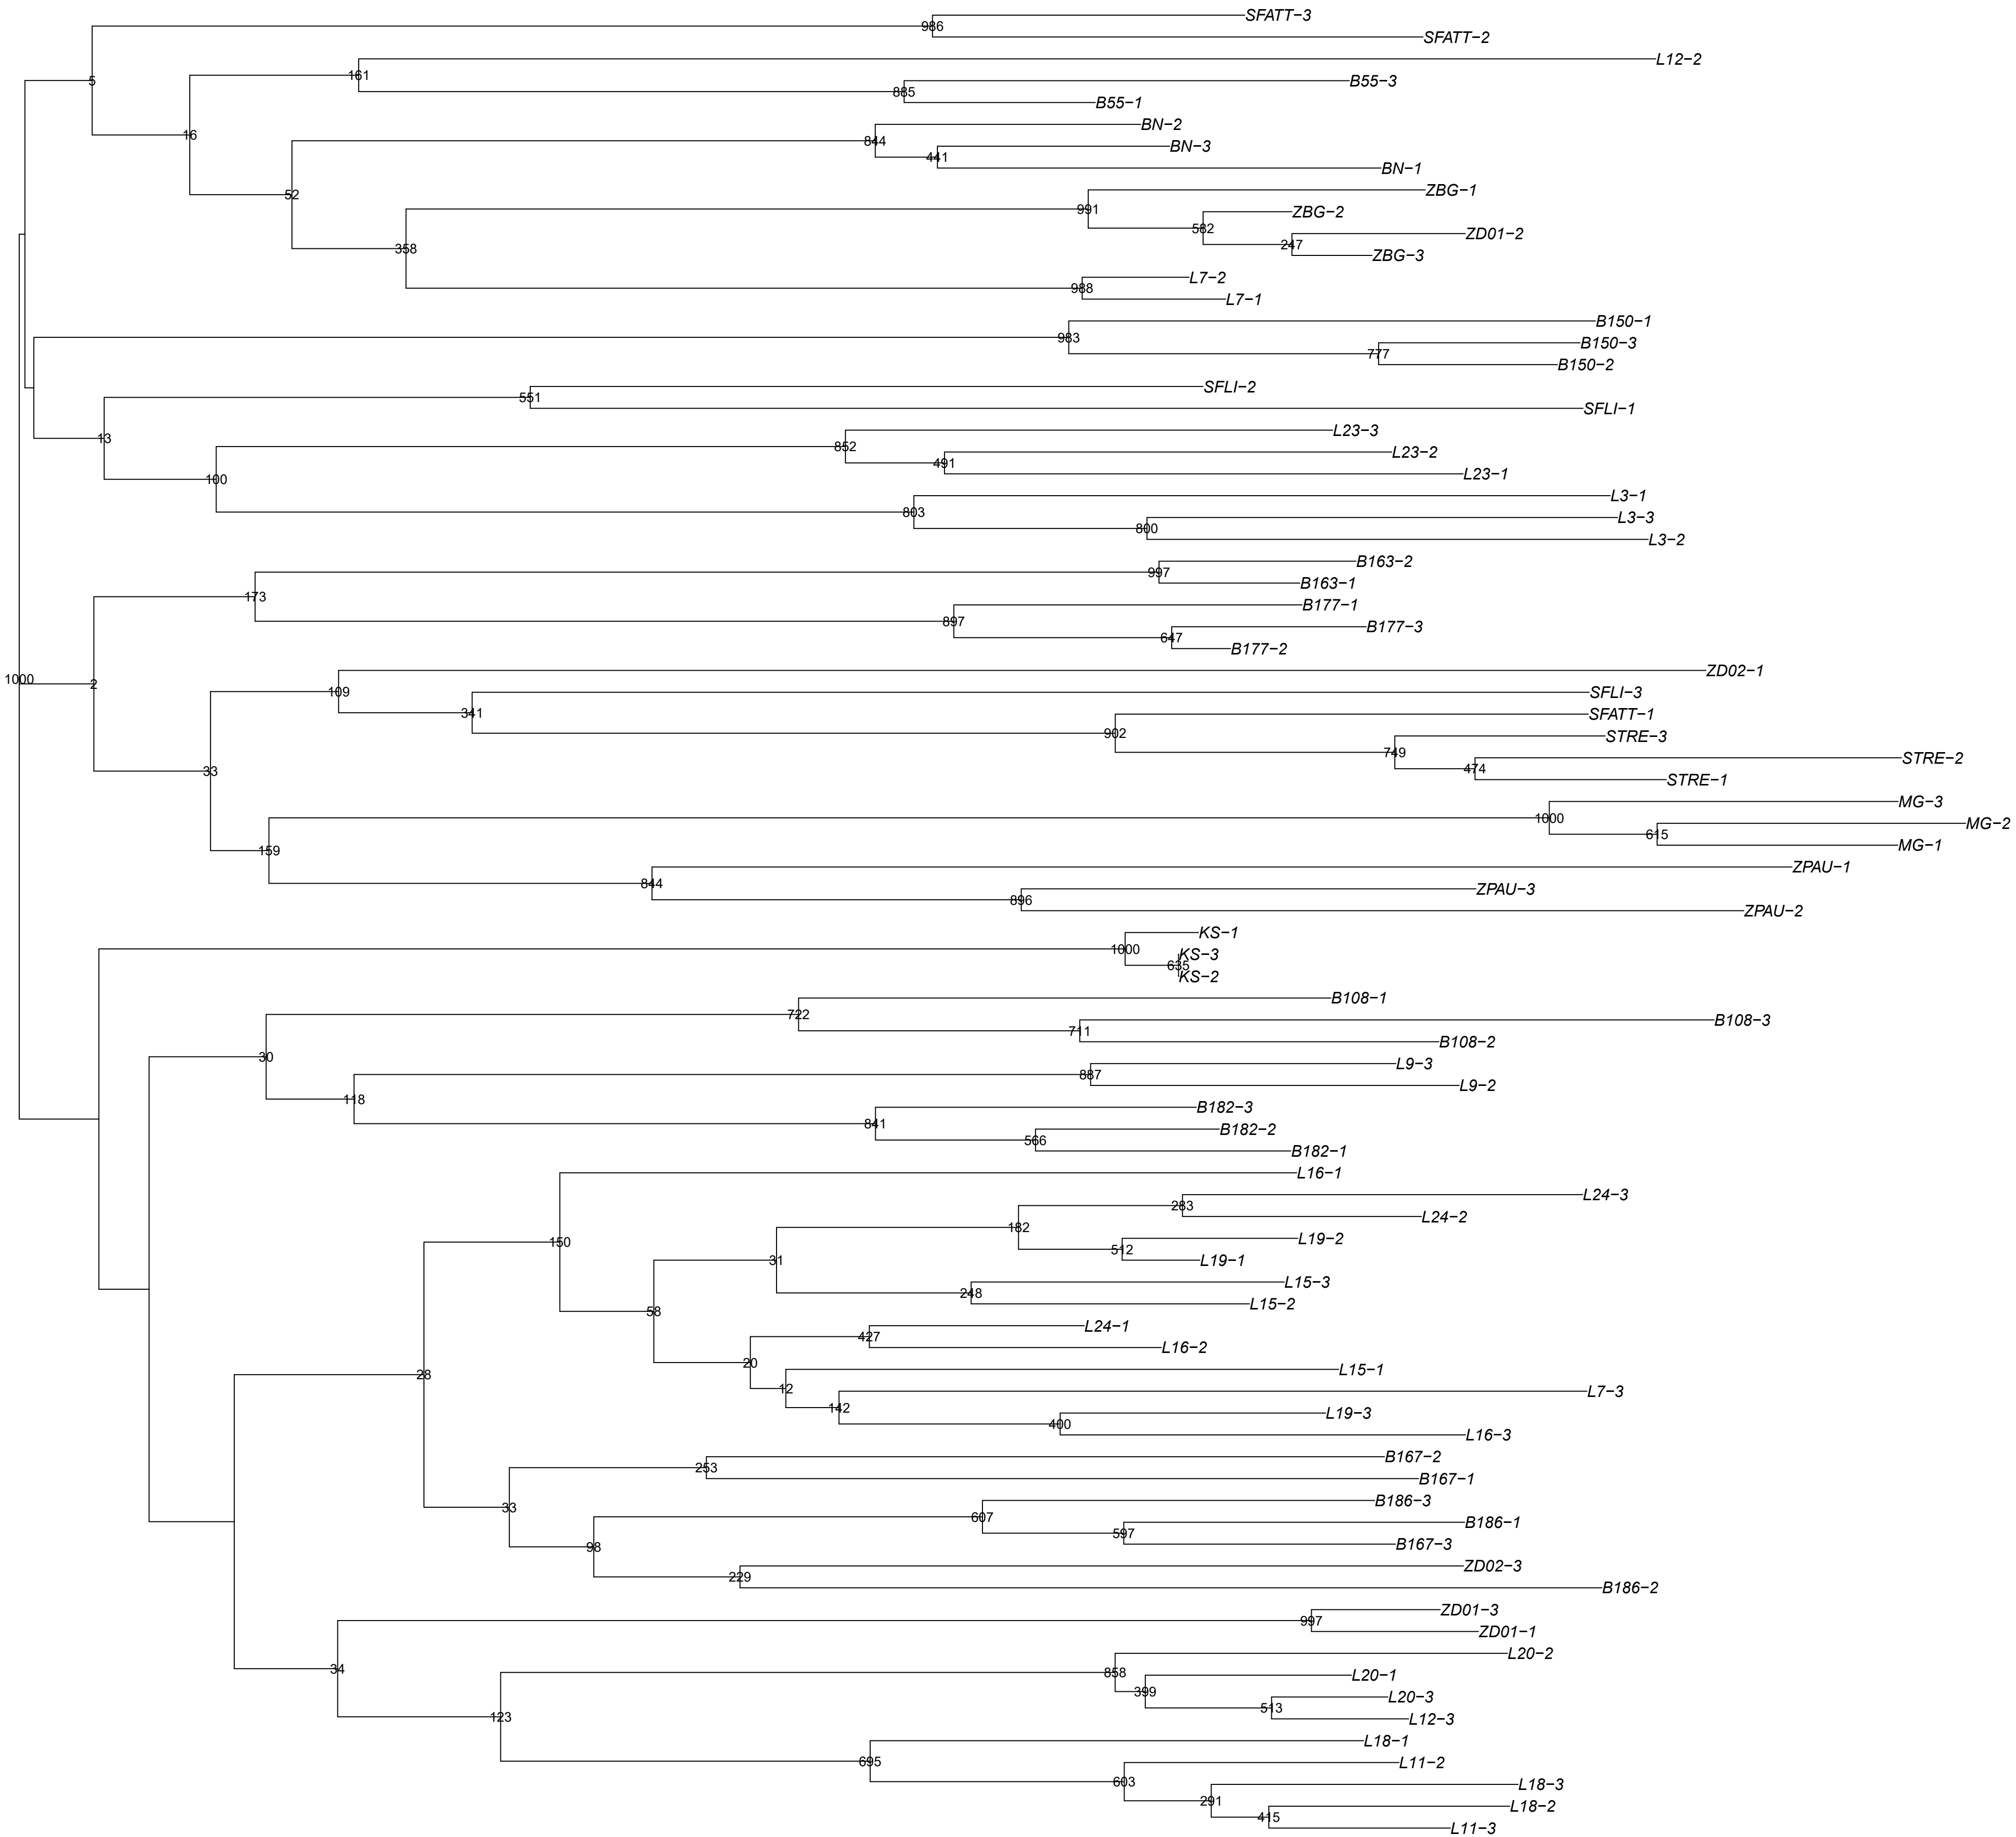

Supplement: pone.0243556.s003.pdf [file pone.0243556.s003.pdf]
