# Supplementary material for: Genetic structure of coast redwood (Sequoia sempervirens [D. Don] Endl.) populations in and outside of the natural distribution range based on nuclear and chloroplast microsatellite markers
Source: PubMed Central journal article supplement (PMC7732113; doi:10.1371/journal.pone.0243556), 2020-12-11

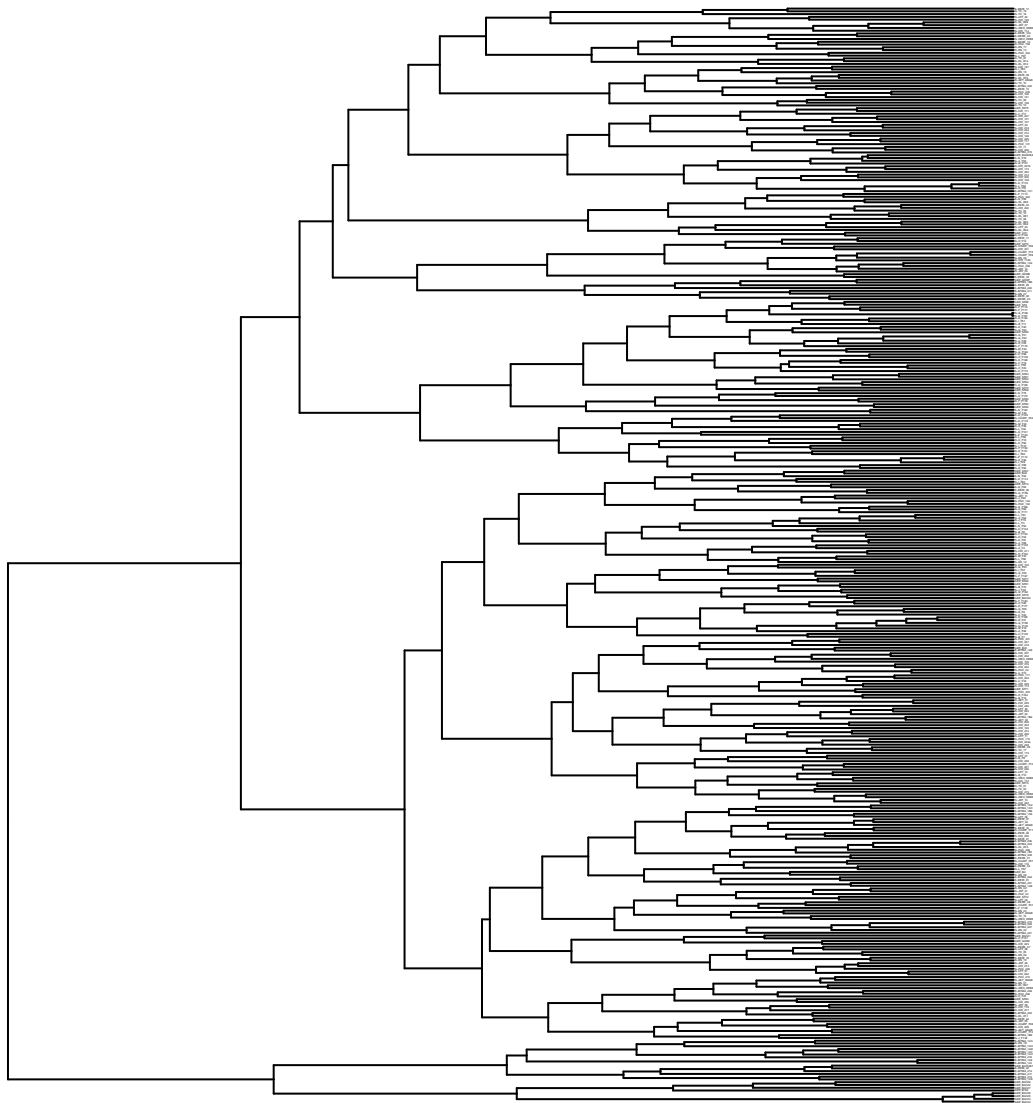

Supplement: pone.0243556.s009.pdf [file pone.0243556.s009.pdf]
