# Supplementary material for: Genetic structure of coast redwood (Sequoia sempervirens [D. Don] Endl.) populations in and outside of the natural distribution range based on nuclear and chloroplast microsatellite markers
Source: PubMed Central journal article supplement (PMC7732113; doi:10.1371/journal.pone.0243556), 2020-12-11

**S12 Fig. Principal coordinate analysis (PCoA) plot based on pairwise individual tree genetic distances between all 396 trees in German (G), French (F) and Californian (C) data sets generated using Q-values for  $K = 30$ .**

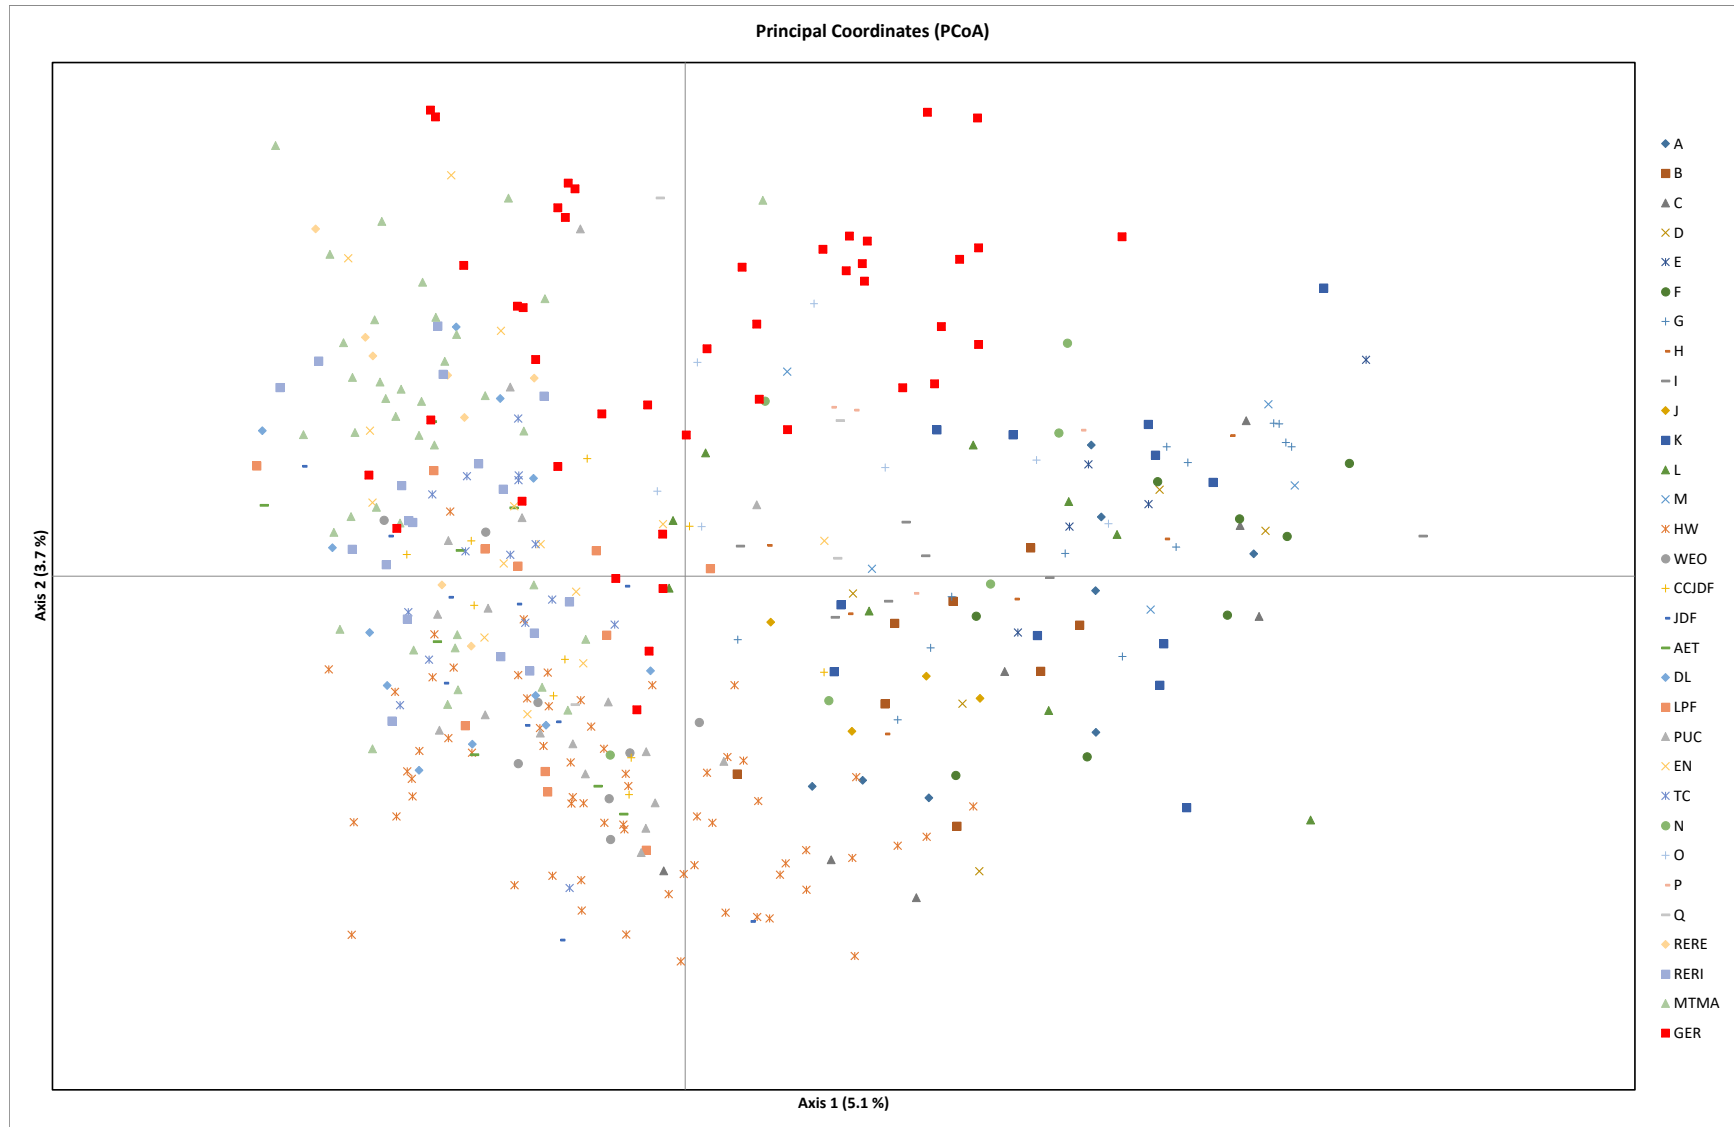

Supplement: pone.0243556.s012.pdf [file pone.0243556.s012.pdf]
