# Supplementary material for: Genetic structure of coast redwood (Sequoia sempervirens [D. Don] Endl.) populations in and outside of the natural distribution range based on nuclear and chloroplast microsatellite markers
Source: PubMed Central journal article supplement (PMC7732113; doi:10.1371/journal.pone.0243556), 2020-12-11

S13 Fig. Q-plots based on the STRUCTURE results for  $K = 17$  and  $K = 30$  for all 396 trees in German (G), French (F) and Californian (C) data sets.

$K = 17$

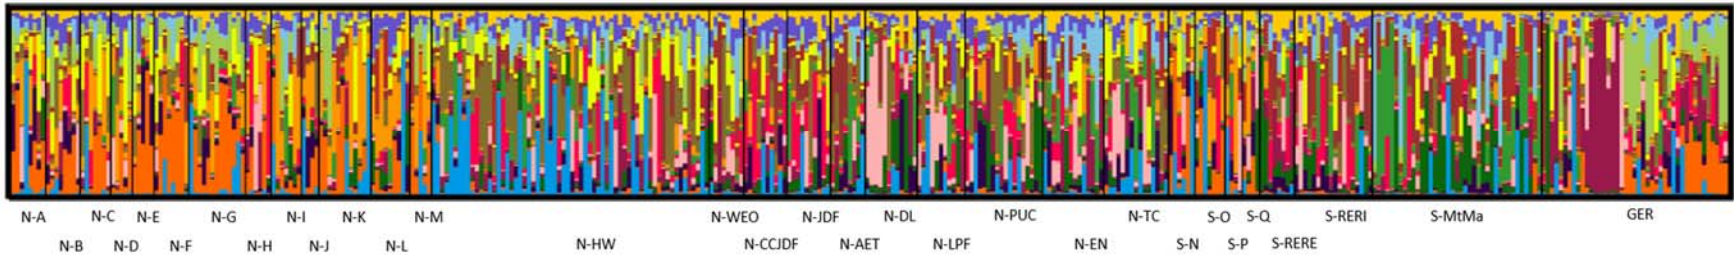

$K = 30$

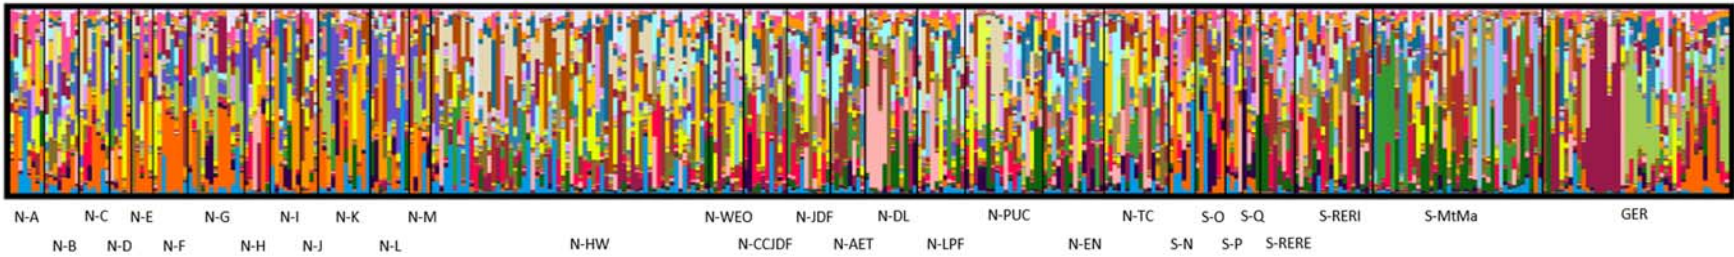

Supplement: pone.0243556.s013.pdf [file pone.0243556.s013.pdf]
