# Supplementary material for: Genetic structure of coast redwood (Sequoia sempervirens [D. Don] Endl.) populations in and outside of the natural distribution range based on nuclear and chloroplast microsatellite markers
Source: PLoS One. 2020 Dec 11;15(12):e0243556. doi: 10.1371/journal.pone.0243556 (PMC7732113; doi:10.1371/journal.pone.0243556)
Supplement: S4 Table — (XLSX) [file pone.0243556.s017.xlsx]

## Sheet: S4 Table data set G
						S4 Table. Sampling site, clone ID, and geographic location for samples collected in Germany (data set G)
individual	0.18	0.19		0.21	0.22	sample	clone ID	sampling site	latitude	longitude	included in GENECLASS analysis
B1	1	1		1	1	B01	SF72	Arboretum Burgholz	51.2238	7.12514	no
B10	1	1		1	1	B02	SF72	Arboretum Burgholz	51.2238	7.12514	no
B100	1	1		1	1	B03	SF72	Arboretum Burgholz	51.2238	7.12514	no
B101	1	1		1	1	B04	B04	Arboretum Burgholz	51.2238	7.12514	yes
B103	1	1		1	1	B05	SF72	Arboretum Burgholz	51.2238	7.12514	no
B104	1	1		1	1	B06	SF72	Arboretum Burgholz	51.2238	7.12514	no
B105	1	1		1	1	B07	SF72	Arboretum Burgholz	51.2238	7.12514	no
B106	1	1		1	1	B08	SF72	Arboretum Burgholz	51.2238	7.12514	no
B107	1	1		1	1	B09	SF72	Arboretum Burgholz	51.2238	7.12514	no
B108	1	1		1	1	B10	SF72	Arboretum Burgholz	51.2238	7.12514	no
						B100	SF72	Arboretum Burgholz	51.2238	7.12514	no
B12	1	1		1	1	B101	SF72	Arboretum Burgholz	51.2238	7.12514	no
B14	1	1		1	1	B102	B102	Arboretum Burgholz	51.2238	7.12514	yes
B15	1	1		1	1	B103	SF72	Arboretum Burgholz	51.2238	7.12514	no
B16	1	1		1	1	B104	SF72	Arboretum Burgholz	51.2238	7.12514	no
B17	1	1		1	1	B105	SF72	Arboretum Burgholz	51.2238	7.12514	no
B18	1	1		1	1	B106	SF72	Arboretum Burgholz	51.2238	7.12514	no
B19	1	1		1	1	B107	SF72	Arboretum Burgholz	51.2238	7.12514	no
B2	1	1		1	1	B108	SF72	Arboretum Burgholz	51.2238	7.12514	no
B20	1	1		1	1	B11	SF72	Arboretum Burgholz	51.2238	7.12514	no
B21	1	1		1	1	B12	SF72	Arboretum Burgholz	51.2238	7.12514	no
B22	1	1		1	1	B13	SF76	Arboretum Burgholz	51.2238	7.12514	no
B23	1	1		1	1	B14	SF72	Arboretum Burgholz	51.2238	7.12514	no
B24	1	1		1	1	B15	SF72	Arboretum Burgholz	51.2238	7.12514	no
B25	1	1		1	1	B16	SF72	Arboretum Burgholz	51.2238	7.12514	no
B26	1	1		1	1	B17	SF72	Arboretum Burgholz	51.2238	7.12514	no
B27	1	1		1	1	B18	SF72	Arboretum Burgholz	51.2238	7.12514	no
B28	1	1		1	1	B19	SF72	Arboretum Burgholz	51.2238	7.12514	no
B29	1	1		1	1	B20	SF72	Arboretum Burgholz	51.2238	7.12514	no
B3	1	1		1	1	B21	SF72	Arboretum Burgholz	51.2238	7.12514	no
						B22	SF72	Arboretum Burgholz	51.2238	7.12514	no
B31	1	1		1	1	B23	SF72	Arboretum Burgholz	51.2238	7.12514	no
B32	1	1		1	1	B24	SF72	Arboretum Burgholz	51.2238	7.12514	no
B33	1	1		1	1	B25	SF72	Arboretum Burgholz	51.2238	7.12514	no
						B26	SF72	Arboretum Burgholz	51.2238	7.12514	no
B36	1	1		1	1	B27	SF72	Arboretum Burgholz	51.2238	7.12514	no
B37	1	1		1	1	B28	SF72	Arboretum Burgholz	51.2238	7.12514	no
B38	1	1		1	1	B29	SF72	Arboretum Burgholz	51.2238	7.12514	no
B39	1	1		1	1	B30	B30	Arboretum Burgholz	51.2238	7.12514	yes
						B31	SF72	Arboretum Burgholz	51.2238	7.12514	no
B40	1	1		1	1	B32	SF72	Arboretum Burgholz	51.2238	7.12514	no
B41	1	1		1	1	B33	SF72	Arboretum Burgholz	51.2238	7.12514	no
						B34	SF72	Arboretum Burgholz	51.2238	7.12514	no
B44	1	1		1	1	B35	SF72	Arboretum Burgholz	51.2238	7.12514	no
B45	1	1		1	1	B36	SF72	Arboretum Burgholz	51.2238	7.12514	no
B46	1	1		1	1	B37	SF72	Arboretum Burgholz	51.2238	7.12514	no
B48	1	1		1	1	B38	SF72	Arboretum Burgholz	51.2238	7.12514	no
B49	1	1		1	1	B39	SF72	Arboretum Burgholz	51.2238	7.12514	no
B5	1	1		1	1	B40	SF72	Arboretum Burgholz	51.2238	7.12514	no
B50	1	1		1	1	B41	SF72	Arboretum Burgholz	51.2238	7.12514	no
B52	1	1		1	1	B42	B42	Arboretum Burgholz	51.2238	7.12514	yes
B53	1	1		1	1	B43	SF72	Arboretum Burgholz	51.2238	7.12514	no
B54	1	1		1	1	B44	SF72	Arboretum Burgholz	51.2238	7.12514	no
B55	1	1		1	1	B45	SF72	Arboretum Burgholz	51.2238	7.12514	no
B56	1	1		1	1	B46	SF72	Arboretum Burgholz	51.2238	7.12514	no
B57	1	1		1	1	B47	SF72	Arboretum Burgholz	51.2238	7.12514	no
B58	1	1		1	1	B48	SF72	Arboretum Burgholz	51.2238	7.12514	no
B59	1	1		1	1	B49	SF72	Arboretum Burgholz	51.2238	7.12514	no
B6	1	1		1	1	B50	SF72	Arboretum Burgholz	51.2238	7.12514	no
B60	1	1		1	1	B51	SF76	Arboretum Burgholz	51.2238	7.12514	no
B61	1	1		1	1	B52	SF72	Arboretum Burgholz	51.2238	7.12514	no
B62	1	1		1	1	B53	SF72	Arboretum Burgholz	51.2238	7.12514	no
B63	1	1		1	1	B54	SF72	Arboretum Burgholz	51.2238	7.12514	no
B64	1	1		1	1	B55	SF72	Arboretum Burgholz	51.2238	7.12514	no
B65	1	1		1	1	B56	SF72	Arboretum Burgholz	51.2238	7.12514	no
B66	1	1		1	1	B57	SF72	Arboretum Burgholz	51.2238	7.12514	no
B67	1	1		1	1	B58	SF72	Arboretum Burgholz	51.2238	7.12514	no
B69	1	1		1	1	B59	SF72	Arboretum Burgholz	51.2238	7.12514	no
B7	1	1		1	1	B60	SF72	Arboretum Burgholz	51.2238	7.12514	no
B70	1	1		1	1	B61	SF72	Arboretum Burgholz	51.2238	7.12514	no
B71	1	1		1	1	B62	SF72	Arboretum Burgholz	51.2238	7.12514	no
B72	1	1		1	1	B63	SF72	Arboretum Burgholz	51.2238	7.12514	no
B73	1	1		1	1	B64	SF72	Arboretum Burgholz	51.2238	7.12514	no
B74	1	1		1	1	B65	SF72	Arboretum Burgholz	51.2238	7.12514	no
B75	1	1		1	1	B66	SF72	Arboretum Burgholz	51.2238	7.12514	no
B76	1	1		1	1	B67	SF72	Arboretum Burgholz	51.2238	7.12514	no
B77	1	1		1	1	B69	SF72	Arboretum Burgholz	51.2238	7.12514	no
B79	1	1		1	1	B70	SF72	Arboretum Burgholz	51.2238	7.12514	no
B8	1	1		1	1	B71	SF72	Arboretum Burgholz	51.2238	7.12514	no
B80	1	1		1	1	B72	SF72	Arboretum Burgholz	51.2238	7.12514	no
B81	1	1		1	1	B73	SF72	Arboretum Burgholz	51.2238	7.12514	no
B82	1	1		1	1	B74	SF72	Arboretum Burgholz	51.2238	7.12514	no
B83	1	1		1	1	B75	SF72	Arboretum Burgholz	51.2238	7.12514	no
B84	1	1		1	1	B76	SF72	Arboretum Burgholz	51.2238	7.12514	no
B85	1	1		1	1	B77	SF72	Arboretum Burgholz	51.2238	7.12514	no
B87	1	1		1	1	B78	SF76	Arboretum Burgholz	51.2238	7.12514	no
B88	1	1		1	1	B79	SF72	Arboretum Burgholz	51.2238	7.12514	no
B9	1	1		1	1	B80	SF72	Arboretum Burgholz	51.2238	7.12514	no
B90	1	1		1	1	B81	SF72	Arboretum Burgholz	51.2238	7.12514	no
B91	1	1		1	1	B82	SF72	Arboretum Burgholz	51.2238	7.12514	no
B92	1	1		1	1	B83	SF72	Arboretum Burgholz	51.2238	7.12514	no
B93	1	1		1	1	B84	SF72	Arboretum Burgholz	51.2238	7.12514	no
B94	1	1		1	1	B85	SF72	Arboretum Burgholz	51.2238	7.12514	no
B95	1	1		1	1	B87	SF72	Arboretum Burgholz	51.2238	7.12514	no
B96	1	1		1	1	B88	SF72	Arboretum Burgholz	51.2238	7.12514	no
B97	1	1		1	1	B90	SF72	Arboretum Burgholz	51.2238	7.12514	no
B98	1	1		1	1	B91	SF72	Arboretum Burgholz	51.2238	7.12514	no
B99	1	1		1	1	B92	SF72	Arboretum Burgholz	51.2238	7.12514	no
BG129	1	1		1	1	B93	SF72	Arboretum Burgholz	51.2238	7.12514	no
BG130	1	1		1	1	B94	SF72	Arboretum Burgholz	51.2238	7.12514	no
SF72	1	1		1	1	B95	SF72	Arboretum Burgholz	51.2238	7.12514	no
B102	2	2		2	2	B96	SF72	Arboretum Burgholz	51.2238	7.12514	no
B13	3	3		3	3	B97	SF72	Arboretum Burgholz	51.2238	7.12514	no
B51	7	7		3	3	B98	SF72	Arboretum Burgholz	51.2238	7.12514	no
B78	7	7		3	3	B99	SF72	Arboretum Burgholz	51.2238	7.12514	no
SF76	29	7		3	3	BA030549	BA030549	Botanic Garden Bayreuth	49.9241	11.5862	yes
B30	4	4		4	4	BA10067	BA10067	Botanic Garden Bayreuth	49.9241	11.5862	yes
B4	5	5		5	5	BG120	BG120	Weltwald Bad Grund	51.8173	10.2286	yes
B42	6	6		6	3	BG121	BG121	Weltwald Bad Grund	51.8173	10.2286	yes
BA030549	8	8		7	6	BG122	BG122	Weltwald Bad Grund	51.8173	10.2286	yes
BA10067	9	9		8	7	BG123	BG123	Weltwald Bad Grund	51.8173	10.2286	yes
BG120	10	10		9	8	BG124	BG124	Weltwald Bad Grund	51.8173	10.2286	yes
BG121	11	11		10	9	BG125	BG125	Weltwald Bad Grund	51.8173	10.2286	yes
BG122	12	12		11	10	BG126	BG126	Weltwald Bad Grund	51.8173	10.2286	yes
BG123	13	13		12	11	BG127	BG127	Weltwald Bad Grund	51.8173	10.2286	yes
BG124	13	13		12	11	BG128	BG128	Weltwald Bad Grund	51.8173	10.2286	yes
BG125	13	13		12	11	BG129	SF72	Weltwald Bad Grund	51.8173	10.2286	no
BG126	14	14		13	12	BG130	SF72	Weltwald Bad Grund	51.8173	10.2286	no
BG127	15	15		14	13	CH1	CH1	Botanic Garden Chemnitz	50.8502	12.8904	yes
BG128	16	16		14	13	GOE_B	GOE_B	Botanic Garden Göttingen	51.5577	9.96246	yes
CH1	17	17		15	14	GOE_G	GOE_G	Botanic Garden Göttingen	51.5577	9.96246	yes
SF3	19	19		16	15	GOE_K	GOE_K	Botanic Garden Göttingen	51.5577	9.96246	yes
SF63	20	20		17	16	GOE_P	GOE_P	Botanic Garden Göttingen	51.5577	9.96246	yes
SF64	21	21		18	17	SF3	SF3	Sequoiafarm Kaldenkirchen	51.3082	6.17195	yes
SF66	22	22		19	18	SF63	SF63	Sequoiafarm Kaldenkirchen	51.3082	6.17195	yes
SF67	23	23		20	19	SF64	SF64	Sequoiafarm Kaldenkirchen	51.3082	6.17195	yes
SF69	24	24		21	20	SF66	SF66	Sequoiafarm Kaldenkirchen	51.3082	6.17195	yes
SF70	24	24		21	20	SF67	SF67	Sequoiafarm Kaldenkirchen	51.3082	6.17195	yes
SF71	25	25		22	21	SF69	SF69	Sequoiafarm Kaldenkirchen	51.3082	6.17195	yes
SF73	26	26		23	22	SF70	SF70	Sequoiafarm Kaldenkirchen	51.3082	6.17195	yes
SF74	27	27		24	23	SF71	SF71	Sequoiafarm Kaldenkirchen	51.3082	6.17195	yes
SF75	28	28		25	24	SF72	SF72	Sequoiafarm Kaldenkirchen	51.3082	6.17195	yes
SF77	30	29		26	25	SF73	SF73	Sequoiafarm Kaldenkirchen	51.3082	6.17195	yes
SF79	31	30		27	26	SF74	SF74	Sequoiafarm Kaldenkirchen	51.3082	6.17195	yes
SF80	32	31		28	27	SF75	SF75	Sequoiafarm Kaldenkirchen	51.3082	6.17195	yes
SF81	33	32		29	28	SF76	SF76	Sequoiafarm Kaldenkirchen	51.3082	6.17195	yes
SF82	34	33		30	2	SF77	SF77	Sequoiafarm Kaldenkirchen	51.3082	6.17195	yes
SF84	35	34		31	29	SF79	SF79	Sequoiafarm Kaldenkirchen	51.3082	6.17195	yes
SF86	36	35		32	30	SF80	SF80	Sequoiafarm Kaldenkirchen	51.3082	6.17195	yes
SF88	37	36		33	31	SF81	SF81	Sequoiafarm Kaldenkirchen	51.3082	6.17195	yes
SF90	38	37		34	32	SF82	SF82	Sequoiafarm Kaldenkirchen	51.3082	6.17195	yes
SF91	39	38		35	33	SF84	SF84	Sequoiafarm Kaldenkirchen	51.3082	6.17195	yes
SF93	40	39		36	34	SF86	SF86	Sequoiafarm Kaldenkirchen	51.3082	6.17195	yes
						SF88	SF88	Sequoiafarm Kaldenkirchen	51.3082	6.17195	yes
						SF90	SF90	Sequoiafarm Kaldenkirchen	51.3082	6.17195	yes
						SF91	SF91	Sequoiafarm Kaldenkirchen	51.3082	6.17195	yes
						SF93	SF93	Sequoiafarm Kaldenkirchen	51.3082	6.17195	yes
